# Supplementary material for: Symmetrical dinuclear complexes with high DNA affinity based on [Ru(dpq)2(phen)]2+Electronic supplementary information (ESI) available: method for determining equilibrium binding constants and representative spectroscopic data for each experiment. See http://www.rsc.org/suppdata/cc/b3/b316917k/
Source: Royal Society of Chemistry journal article supplement (doi:10.1039/b316917k), 2004-01-01
Supplement: b316917k.doc [file b316917k.doc]

**SUPPLEMENTARY MATERIAL**

Dinuclear complexes based on [Ru(dpq)2(phen)]2+ with high DNA affinity

Janice Aldrich-Wrighta*, Craig Brodiea, Edith C. Glazerb, Nathan W. Luedtkeb, Lev Elson-Schwabb and Yitzhak Torb

a School of Science, Food and Horticulture, College of Science, Technology and Environment,

University of Western Sydney, Penrith South, NSW, 1797, Australia. Fax: (+61) 246203025; Tel: (+61) 246203218; E-mail: [J.Aldrich-Wright@uws.edu.au](mailto:J.Aldrich-Wright@uws.edu.au)

b[Department of Chemistry and Biochemistry, 0358, University of California, San Diego, La Jolla, CA 92093-0358, U.S.A.](mailto:j.Aldrich-Wright@uws.edu.au)

# Method for the Determination of Equilibrium Binding Constants and an Example Spectroscopic data from each experiment

Using the information gained from the emission spectra and utilising the methods of McGee and von Hippel27 (for the monomer) and Roger and Nordén26 (for the dimers), the binding constants for each of the compounds were determined. A way to measure the binding strength between two molecules is to determine the equilibrium binding constant between the free metal complex, empty binding site and bound metal complex. The relationship is a ratio of the concentration of the bound metal complex (MC*b*), concentration of the free metal complex (MC*f*) and the free DNA site concentration (DNA*f*) as shown in Equation 1. For this experiment the metal concentration was kept constant (MC*tot*) while the DNA concentration (DNA*tot*) was varied with the addition of aliquots of DNA. If the binding event is independent (that is no cooperative or non-cooperative binding) then equation 2 shows the relationship between varying DNA*tot* concentration and the change in emission ().26 The Rodger and Nordén26 method has the advantage of not requiring low or high loading data. By plotting the x and y values of equations 3 and 4, a linear relationship with a slope of MCtot/ and a y-intercept of nis produced Where n is the number of binding sites (in base pairs) and i is a constant that varies with wavelength. is derived from the observed spectrum as a consequence of changes the proportion of metal complex bound (MC*b*) as represented in equation 5. The concentration of free metal complex (MC*f*), (the total metal complex (MC*tot*) - the metal complex bound (MC*b*)) is determined for each concentration of complex added and is then used to form a Scatchard plot of r versus r/MC*f*, (r and r/MC*f* are defined below). The slope = -Kb and the y-intercept = Kb/n are obtained from the plot (equation 6). When the a Scatchard plot is not linear the Kb and n are obtained from the McGee / von Hippel equation (7).

|  | (1) |
| --- | --- |
|  | (2) |
|  | (3 & 4) |
|  | (5) |
| where  andd | (6) |
|  | (7) |

Binding data determined for **[Ru(dpq)2(phen)]Cl2** [1.23 x 10-6] bound to Calf Thymus DNA in 10 mM aqueous pH 7.1 phosphate buffer and 100 mM NaCl, 1 mM EDTA. Emission plot and response curve is at the top with the data below.

**[Metal] = 4.16 x 10-8 [DNA/bp] stock solution = 7.76 x 10-4**

| **[DNA/bp]** | **[DNA]/[Ru]** | **Emission Measured**  Max 606 nm |
| --- | --- | --- |
| 0.00E+00 | 0 | 8.89 |
| 2.59E-07 | 6 | 9.12 |
| 7.75E-07 | 19 | 9.69 |
| 1.29E-06 | 31 | 10.13 |
| 1.81E-06 | 44 | 10.43 |
| 2.32E-06 | 56 | 10.85 |
| 2.83E-06 | 68 | 11.29 |
| 3.35E-06 | 81 | 11.60 |
| 4.37E-06 | 106 | 12.28 |
| 5.39E-06 | 131 | 12.67 |
| 6.41E-06 | 155 | 13.10 |
| 7.43E-06 | 180 | 13.64 |
| 8.44E-06 | 205 | 14.16 |
| 9.96E-06 | 243 | 14.77 |
| 1.15E-05 | 280 | 15.45 |
| 1.40E-05 | 342 | 16.18 |
| 1.65E-05 | 404 | 17.13 |
| 1.89E-05 | 466 | 17.80 |
| 2.14E-05 | 529 | 18.25 |
| 2.38E-05 | 591 | 18.82 |
| 2.62E-05 | 653 | 19.39 |
| 2.98E-05 | 746 | 20.28 |
| 3.34E-05 | 839 | 20.64 |
| 3.81E-05 | 964 | 21.52 |
| 4.28E-05 | 1088 | 22.00 |
| 4.96E-05 | 1275 | 22.55 |
| 5.86E-05 | 1523 | 23.18 |
| 7.16E-05 | 1896 | 23.96 |
| 8.42E-05 | 2270 | 24.46 |
| 9.63E-05 | 2643 | 24.99 |
| 1.16E-04 | 3264 | 25.28 |
| 1.34E-04 | 3886 | 25.08 |

Binding data determined for **[Ru(dpq)2(phen-4-SOS)]Cl2** [8.72 x 10-7] bound to Calf Thymus DNA in 10 mM aqueous pH 7.1 phosphate buffer and 100 mM NaCl, 1 mM EDTA. Emission plot and response curve is at the top with the data below.

**[Metal] = 8.72 x 10-7 [DNA/bp] stock solution = 3.85 x 10-4**

| **[DNA/bp]** | **[DNA]/[DIMER]** | **Emission Measured**  Max 603 nm |
| --- | --- | --- |
| 0.00E+00 | 0.0 | 25.09 |
| 3.82E-07 | 0.4 | 26.58 |
| 5.09E-07 | 0.6 | 27.94 |
| 6.36E-07 | 0.7 | 32.00 |
| 7.63E-07 | 0.9 | 30.02 |
| 1.02E-06 | 1.2 | 31.36 |
| 1.14E-06 | 1.3 | 32.57 |
| 1.27E-06 | 1.5 | 33.11 |
| 1.52E-06 | 1.8 | 33.95 |
| 2.03E-06 | 2.3 | 36.12 |
| 3.04E-06 | 4 | 39.45 |
| 5.03E-06 | 6 | 43.46 |
| 8.97E-06 | 11 | 51.47 |
| 1.66E-05 | 20 | 59.70 |
| 3.10E-05 | 39 | 69.86 |
| 4.42E-05 | 57 | 73.98 |
| 5.66E-05 | 76 | 72.51 |
|  |  |  |

Binding data determined for **[{Ru(dpq)2}2(phen-3-SOS-3-phen)]Cl4** [4.99 x 10-8] bound to Calf Thymus DNA in 10 mM aqueous pH 7.1 phosphate buffer and 100 mM NaCl, 1 mM EDTA. Emission plot and response curve is at the top with the data below.

**[Metal] = 4.99 x 10-8 [DNA/bp] stock solution = 3.01 x 10-4**

| **[DNA/bp]** | **[DNA]/[DIMER]** | **Emission Measured**  Max 603 nm |
| --- | --- | --- |
| 0.00E+00 | 0 | 24.43 |
| 5.01E-08 | 1 | 25.98 |
| 1.50E-07 | 3 | 28.76 |
| 2.50E-07 | 5 | 31.19 |
| 3.50E-07 | 7 | 33.00 |
| 4.50E-07 | 9 | 34.01 |
| 5.50E-07 | 11 | 34.70 |
| 6.50E-07 | 13 | 35.53 |
| 7.49E-07 | 15 | 36.65 |
| 8.49E-07 | 17 | 36.41 |
| 9.49E-07 | 19 | 36.85 |
| 1.05E-06 | 21 | 37.35 |
| 1.15E-06 | 23 | 37.72 |
| 1.35E-06 | 27 | 37.88 |
| 1.74E-06 | 35 | 38.74 |
| 2.53E-06 | 51 | 39.29 |
| 4.10E-06 | 83 | 39.73 |

Binding data determined **for [{Ru(dpq)2}2(phen-4-SOS-4-phen)]Cl4** [3.35 x 10-8] bound to Calf Thymus DNA in 10 mM aqueous pH 7.1 phosphate buffer and 100 mM NaCl, 1 mM EDTA. Emission plot and response curve is at the top with the data below.

**[Metal] = 8.57 x 10-8 [DNA/bp] stock solution = 3.85 x 10-4**

| **[DNA/bp]** | **[DNA]/[Dimer]** | **Emission Measured**  Max 610 nm |
| --- | --- | --- |
| 0.00E+00 | 0 | 13.91 |
| 1.28E-07 | 1 | 16.98 |
| 2.56E-07 | 3 | 19.75 |
| 3.85E-07 | 4 | 22.24 |
| 5.13E-07 | 6 | 23.96 |
| 6.41E-07 | 7 | 25.04 |
| 7.68E-07 | 9 | 26.21 |
| 8.96E-07 | 10 | 26.98 |
| 1.02E-06 | 12 | 27.77 |
| 1.15E-06 | 13 | 28.36 |
| 1.28E-06 | 15 | 28.64 |
| 1.53E-06 | 18 | 29.25 |
| 2.04E-06 | 24 | 29.80 |
| 3.06E-06 | 36 | 30.80 |
| 5.07E-06 | 60 | 31.54 |

Binding data determined for **[{Ru(dpq)2}2(phen-SOS-5-phen)]Cl4** [2.53 x 10-8] bound to Calf Thymus DNA in 10 mM aqueous pH 7.1 phosphate buffer and 100 mM NaCl, 1 mM EDTA. Emission plot and response curve is at the top with the data below.

**[Metal] = 2.53 x 10-8 [DNA/bp] stock solution = 3.85 x 10-4**

| **[DNA/bp]** | **[DNA]/[Dimer]** | **Emission Measured**  Max 605 nm |
| --- | --- | --- |
| 0 | 1 | 20.60 |
| 1.28E-07 | 5 | 25.48 |
| 2.56E-07 | 10 | 28.17 |
| 3.85E-07 | 15 | 30.13 |
| 5.13E-07 | 20 | 31.64 |
| 6.41E-07 | 25 | 33.28 |
| 7.68E-07 | 30 | 34.31 |
| 8.96E-07 | 35 | 35.59 |
| 1.02E-06 | 41 | 36.46 |
| 1.15E-06 | 46 | 37.43 |
| 1.28E-06 | 51 | 37.96 |
| 1.53E-06 | 61 | 38.64 |
| 2.04E-06 | 81 | 39.89 |
| 3.06E-06 | 122 | 40.65 |
| 5.07E-06 | 203 | 41.84 |
